# Supplementary material
Source: PubMed Central journal article supplement (PMC7206082)

# Supplemental Figure 1

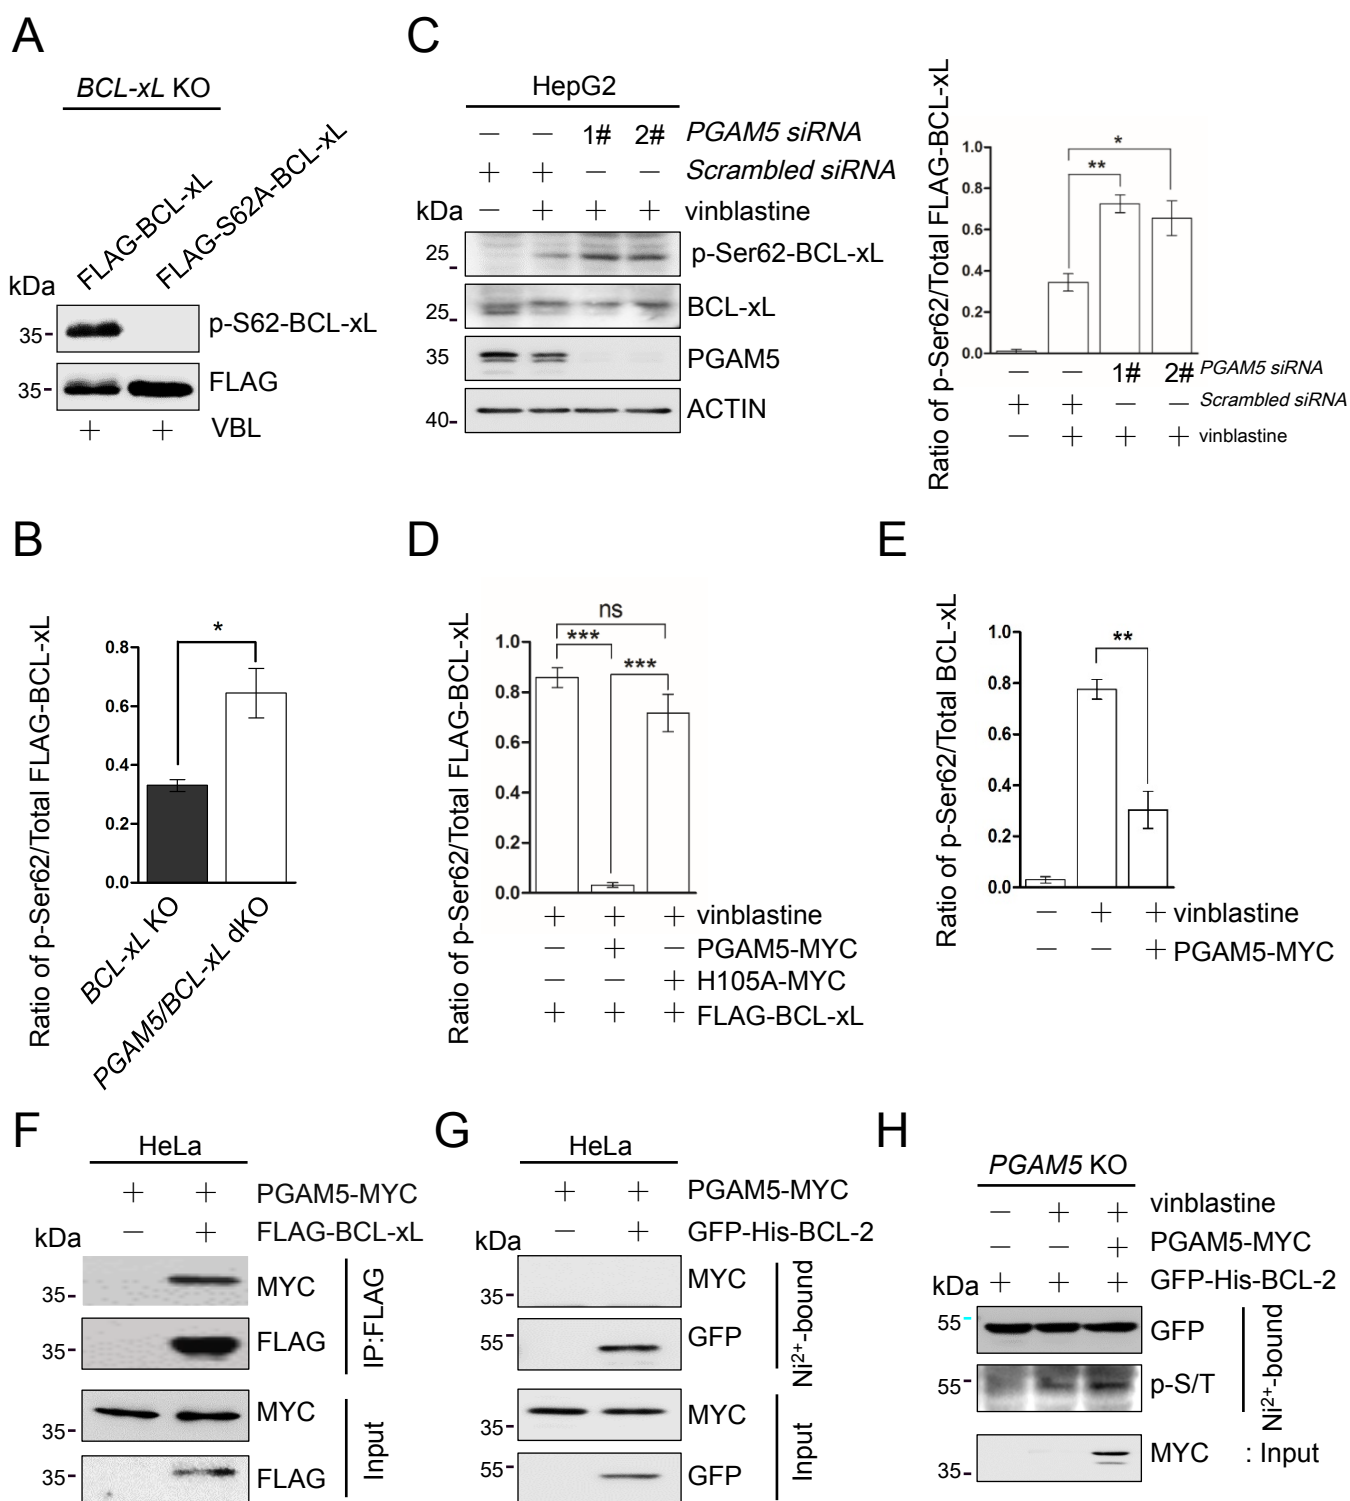

# Supplemental Figure 2

## A

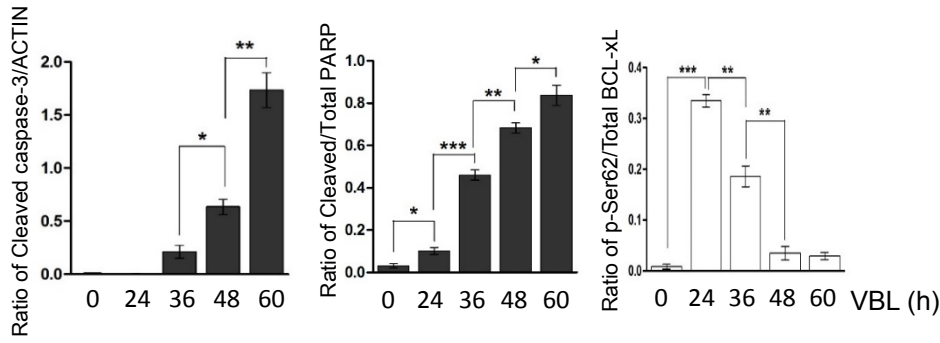

## B

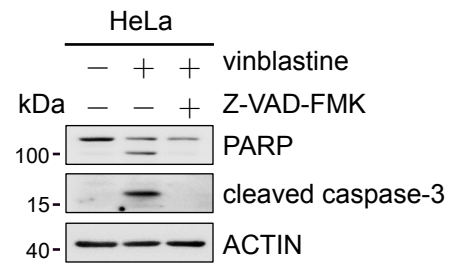

## C

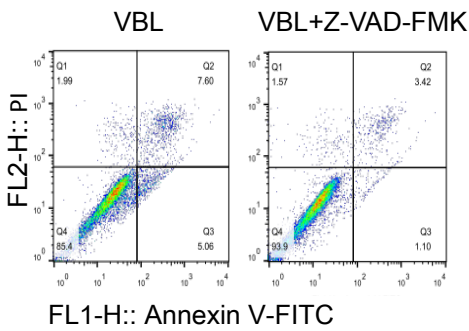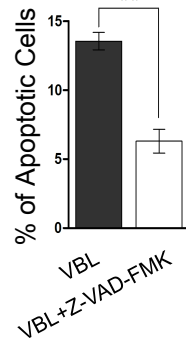

## D

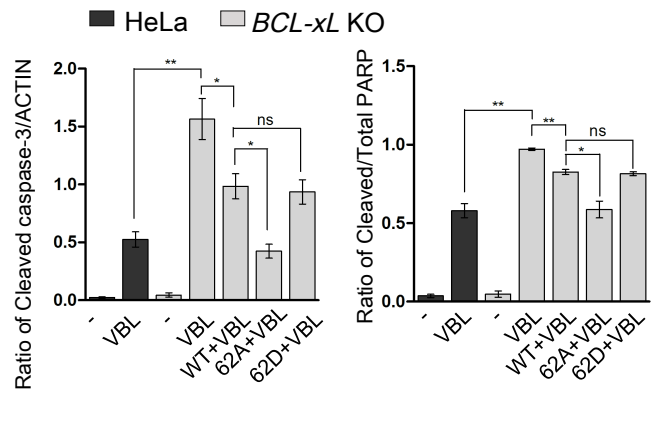

## E

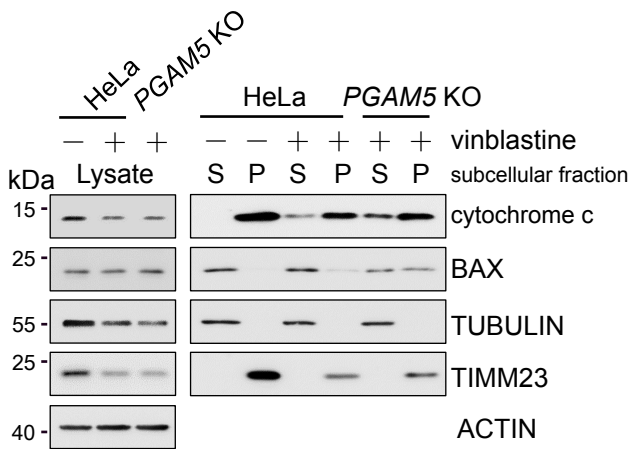

## F

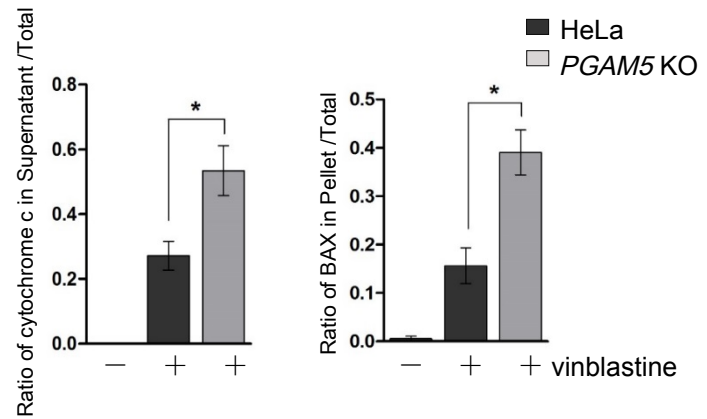

## G

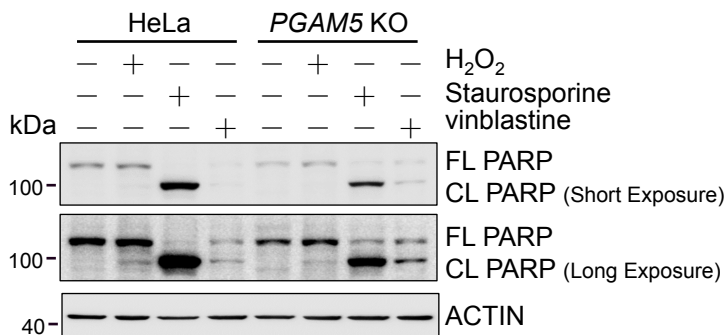

## H

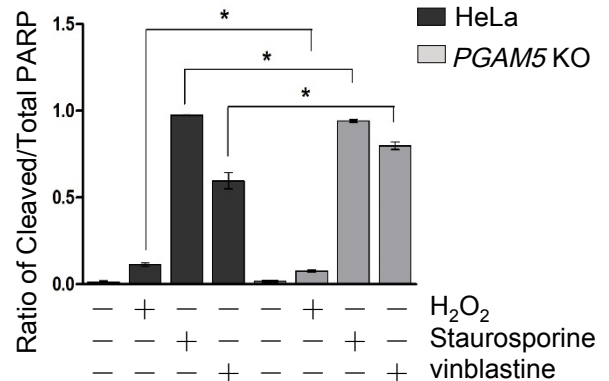

# Supplemental Figure 3

A

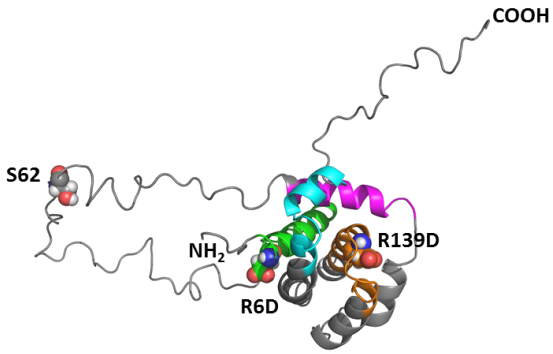

B

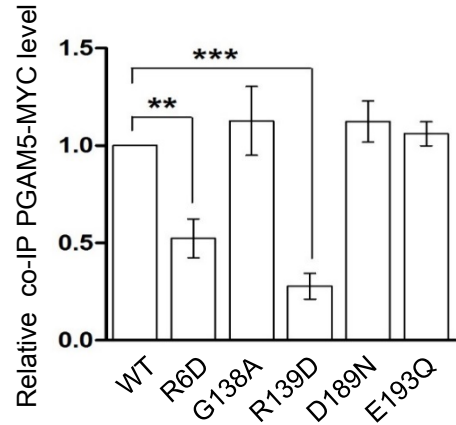

C

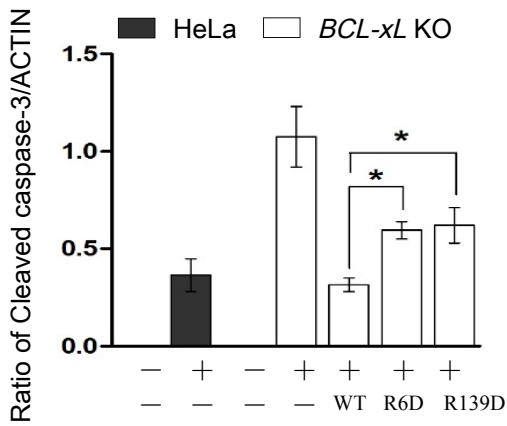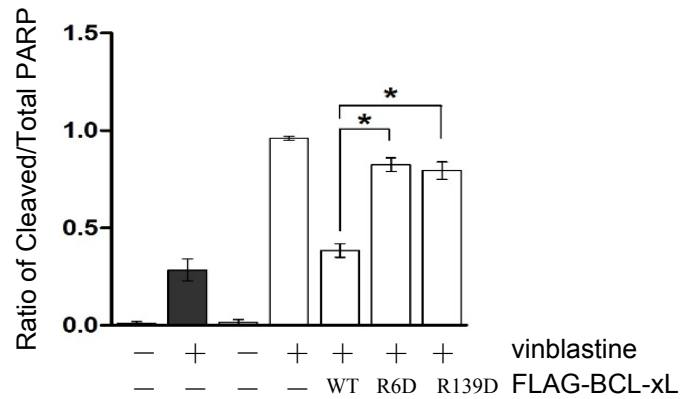

D

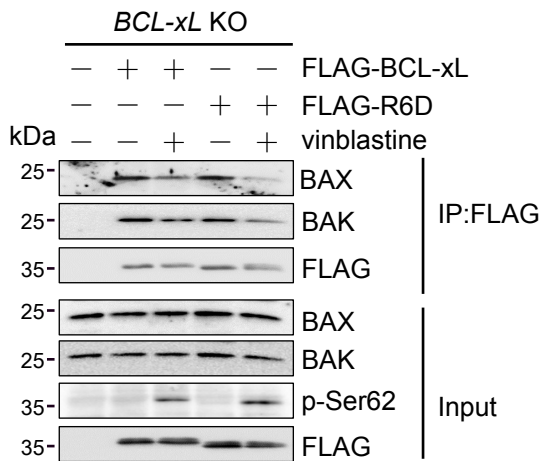

E

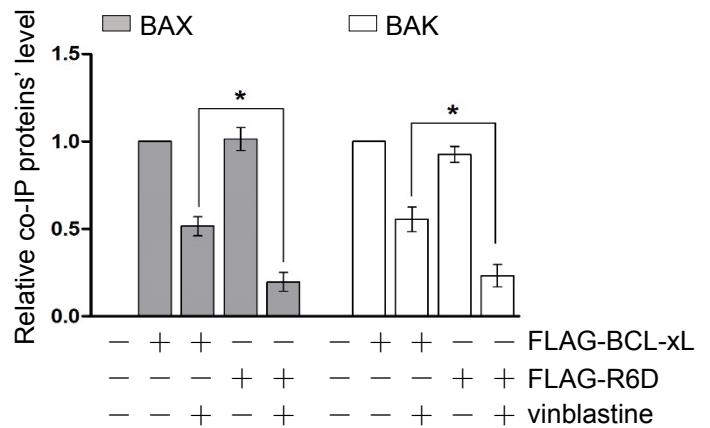

# Supplemental Figure 4

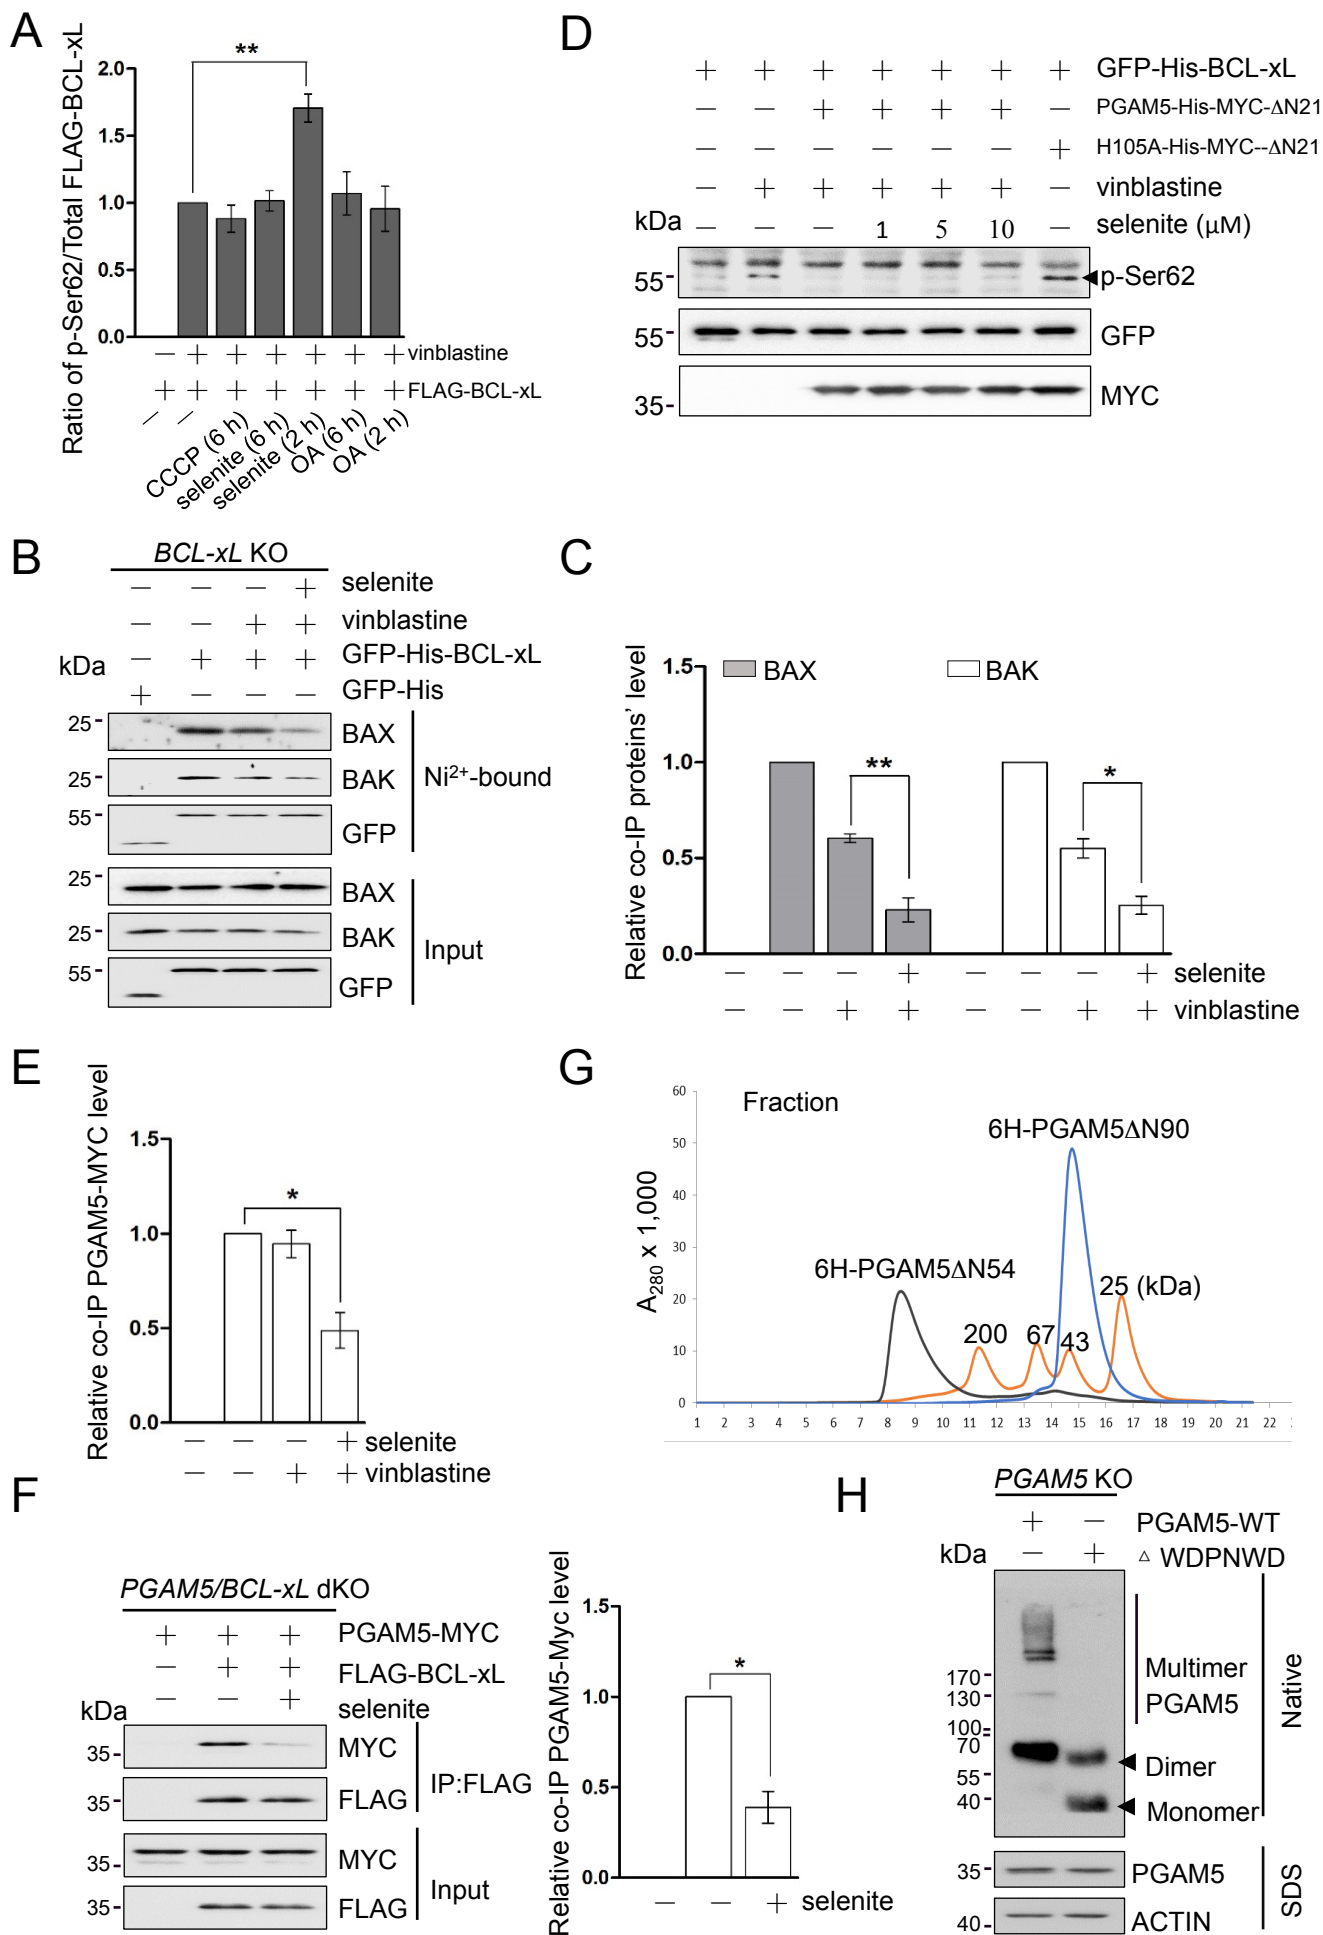

# Supplemental Figure 5

**A**

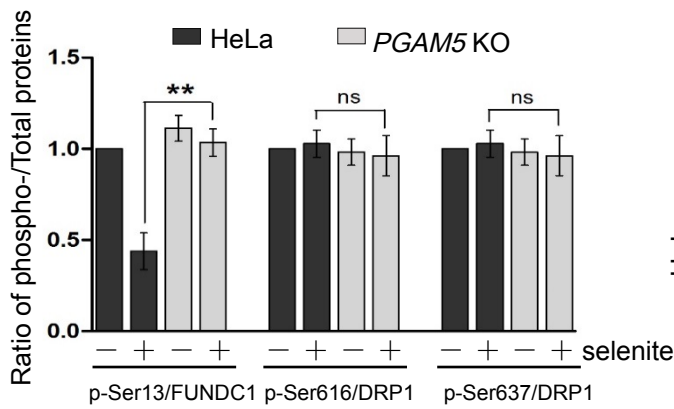

**B**

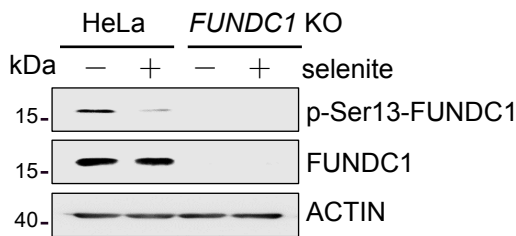

**C**

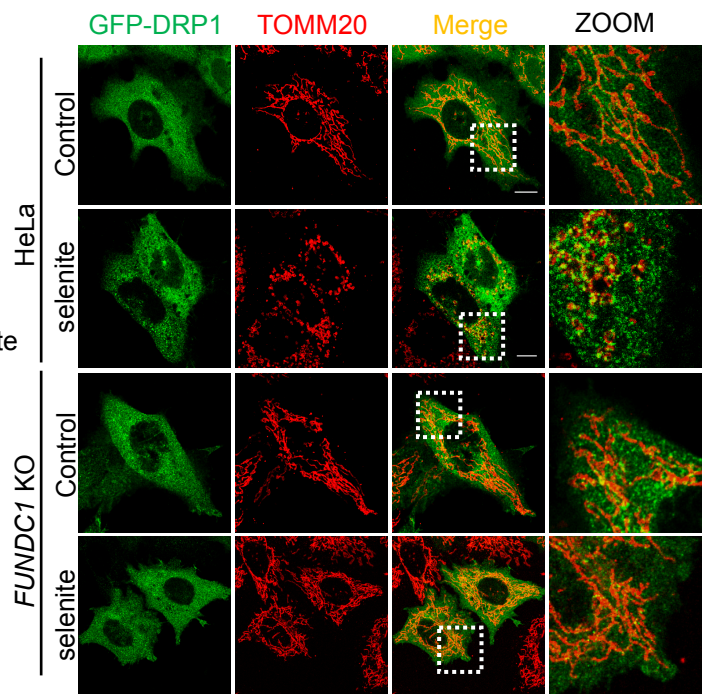

**D**

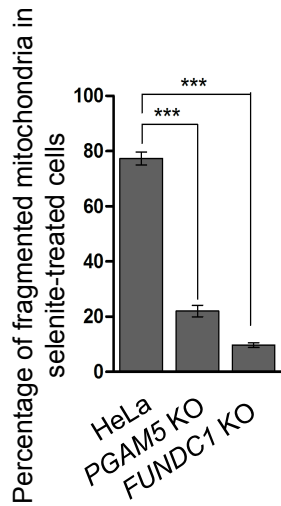

**F**

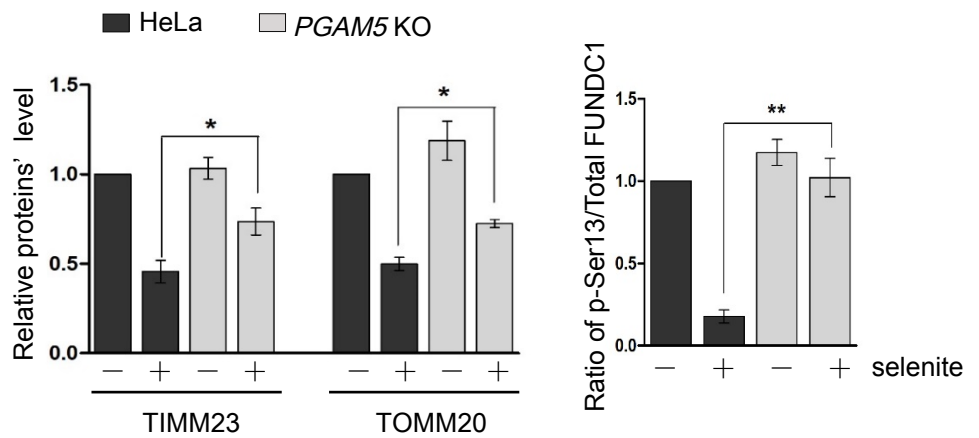

**E**

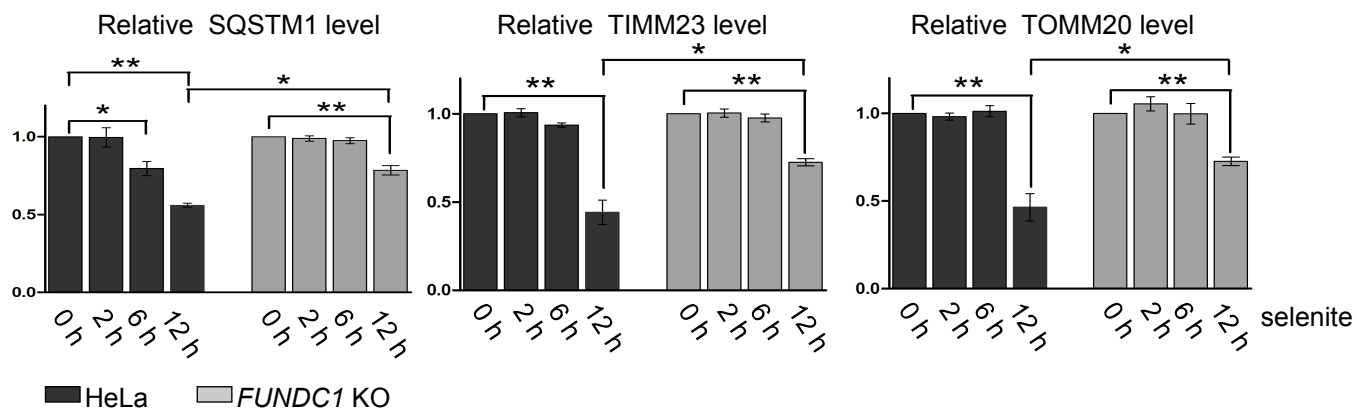

# Supplemental Figure 6

## A

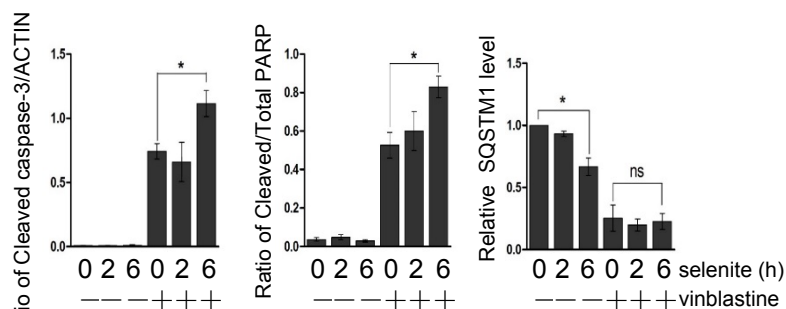

## B

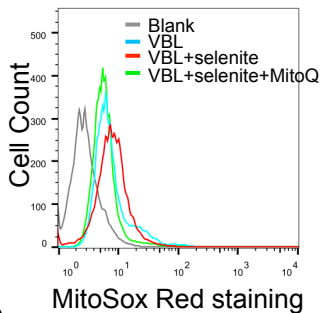

## C

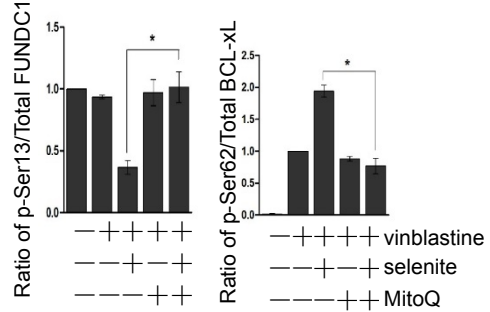

## D

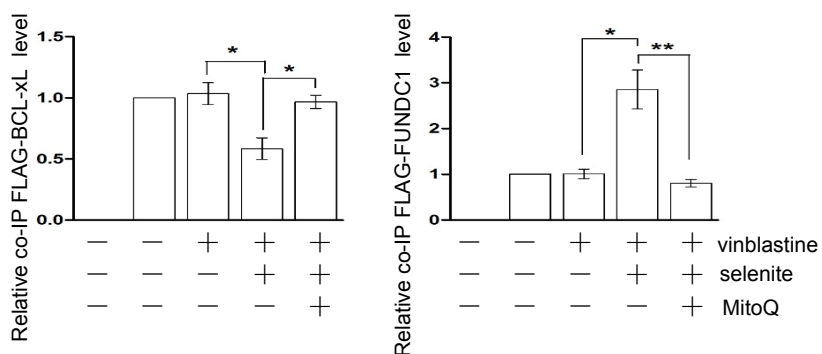

## E

## E

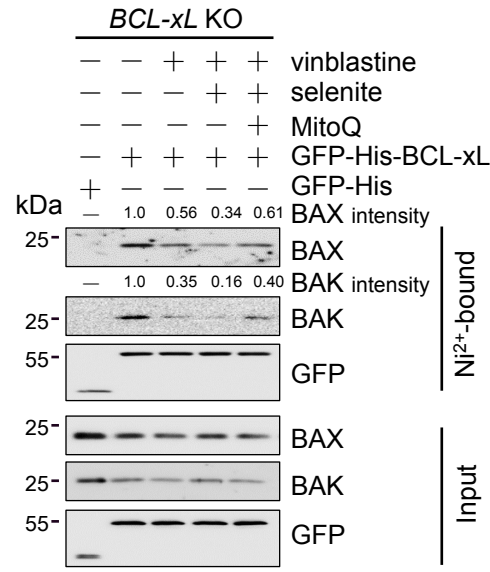

## F

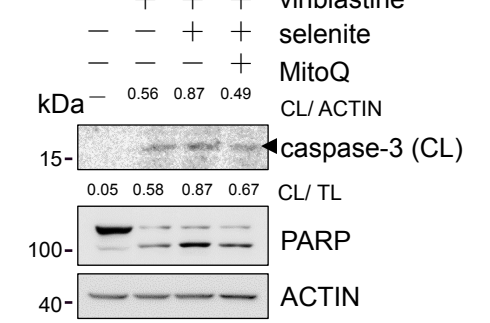

## G

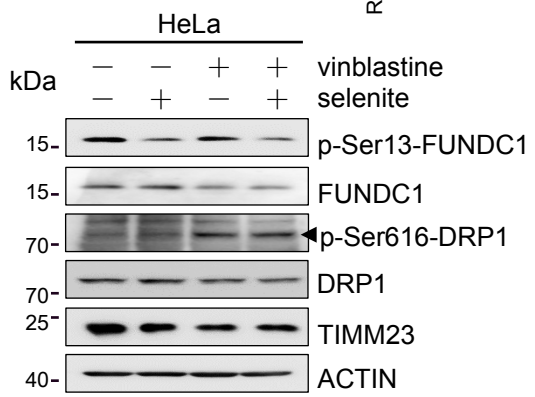

## H

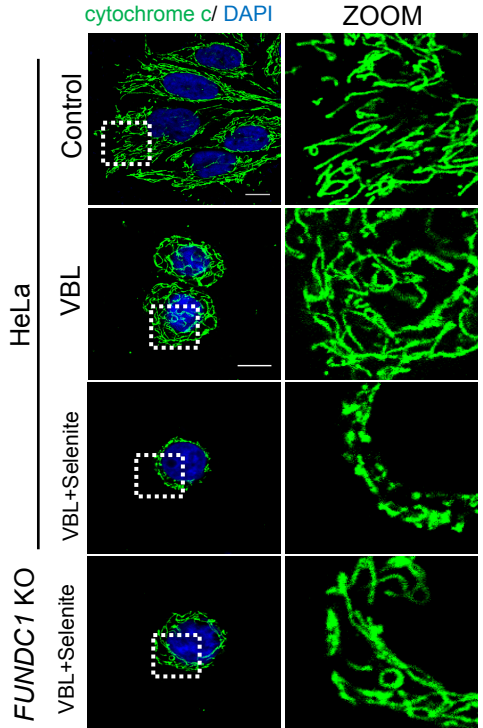

## I

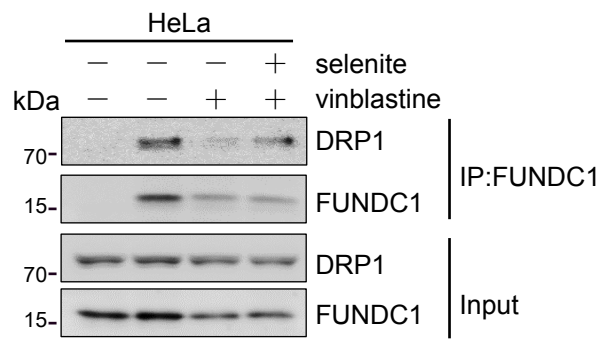

Supplement: 41418_2019_396_MOESM1_ESM.pdf [file 41418_2019_396_MOESM1_ESM.pdf]
